# Supplementary material for: Evidence by neutron diffraction of molecular compounds in triarylamine tris-amide organogels and in their hybrid thermoreversible gels with PVC
Source: Royal Society of Chemistry journal article supplement (doi:10.1039/d2sm00254j), 2022-01-01
Supplement: d2sm00254j1.pdf [file d2sm00254j1.pdf]

## Supplementary information

### **EVIDENCE BY NEUTRON DIFFRACTION OF MOLECULAR COMPOUNDS IN TRIARYLAMINE TRIS-AMIDE ORGANOGELS AND IN THEIR HYBRID THERMOREVERSIBLE GELS WITH PVC.**

GUENET<sup>1\*</sup>, Jean-Michel ; DEMÉ<sup>2</sup>; Bruno; GAVAT<sup>1</sup>; Odile; MOULIN<sup>1</sup>; Emilie; GIUSEPPONE<sup>1</sup>,  
Nicolas

1 Institut Charles Sadron  
CNRS-Université de Strasbourg  
23 rue du Loess, BP84047  
67034 STRASBOURG, Cedex2, France

2 Institut Laue-Langevin  
71 avenue des Martyrs CS 20156  
38042 GRENOBLE Cedex 9 - France

| component                                | TATA  | BrBzH  | BrBzD | o-DCBH | o-DCBD | TCEH  | TCED  | PVC   |
|------------------------------------------|-------|--------|-------|--------|--------|-------|-------|-------|
| $A = \sum b_i \times 10^{12} \text{ cm}$ | 8     | 2.8    | 8.03  | 4.4    | 8.59   | 4.41  | 6.51  | 1.17  |
| $\frac{A}{v_m}$                          | 0.011 | 0.0264 | 0.076 | 0.039  | 0.077  | 0.042 | 0.062 | 0.030 |
| $\frac{Z_e}{v_m}$                        | 0.583 | 0.72   | 0.72  | 0.68   | 0.68   | 0.78  | 0.78  | 0.71  |

**Table S1:** Scattering amplitudes<sup>18</sup> of the different components used in the present study obtained by summing the scattering length  $b_i$  of the constituting atoms, together with the amplitude per unit molar volume ( $v_m$ ), and the number of electrons  $Z_e$  per unit molar volume. The latter allow comparison between the different radiations and components.

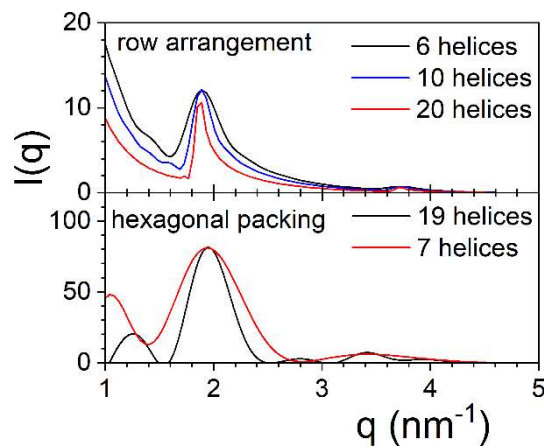

**Figure S1:** theoretical curves for hexagonal packing and for arrangement in a row calculated from relation 4. The number of helices is indicated.

| $q_{\text{BrBZH}}$ | $d_{\text{BrBZH}}$ | $q_{\text{BrBZD}}$ | $d_{\text{BrBZD}}$ | $q_{\text{oDCBH}}$ | $d_{\text{oDCBH}}$ | $q_{\text{oDCBD}}$ | $d_{\text{oDCBD}}$ |
|--------------------|--------------------|--------------------|--------------------|--------------------|--------------------|--------------------|--------------------|
| 1.96               | 3.2                | 1.96               | 3.2                | 2.005              | 3.134              | 2.005              | 3.134              |
|                    |                    | 3.469              | 1.81               | <i>3.38</i>        | <i>1.859</i>       | 3.366              | 1.867              |
|                    |                    | 5.76               | 1.091              | <i>5.48</i>        | <i>1.146</i>       | 5.483              | 1.146              |

**Table S2:** Diffraction peaks position  $q$  ( $\text{nm}^{-1}$ ) in TATA/BrBZ and TATA/o-DCB at  $T= 20^\circ\text{C}$ , and the corresponding distances (nm) calculated by means of Bragg's law. Values in red italics indicate very weak peak.

| $q_{\text{exp}}$<br>( $\text{nm}^{-1}$ ) | $d_{\text{exp}}$<br>(nm) | I (q) | hk       | FWHM | $d_{\text{cal}}$<br>(nm) | Lattice parameters<br>TATA/TCE                                         | Lattice parameters<br>structure I <sup>13</sup>                       |
|------------------------------------------|--------------------------|-------|----------|------|--------------------------|------------------------------------------------------------------------|-----------------------------------------------------------------------|
| 2.22                                     | 2.86                     | S     | 11       | 0.17 | 2.86                     | Orthorhombic<br>$a = 2.98$ nm<br>$b = 10.04$ nm<br>$\gamma = 90^\circ$ | Orthorhombic<br>$a = 2.78$ nm<br>$b = 7.85$ nm<br>$\gamma = 90^\circ$ |
| 2.5                                      | 2.51                     | S     | 04       | 0.13 | 2.51                     |                                                                        |                                                                       |
| 2.94                                     | 2.14                     | VS    | 13       | 0.15 | 2.22                     |                                                                        |                                                                       |
| 3.67                                     | 1.71                     | VS    | 06<br>15 | 0.15 | 1.674<br>1.665           |                                                                        |                                                                       |
| 6.281                                    | 1.00                     | W     | 31       | 0.12 | 0.989                    |                                                                        |                                                                       |
| 6.59                                     | 0.95                     | W     | 28       | 0.13 | 0.960                    |                                                                        |                                                                       |
| 7.37                                     | 0.852                    | W     | 0,12     | 0.13 | 0.837                    |                                                                        |                                                                       |

**Table S3:** Tentative structure in TATA/TCEH at 20°C based on the structure I previously published<sup>13</sup>.  $q_{\text{exp}}$ ,  $d_{\text{exp}}$ ,  $q_{\text{cal}}$ ,  $d_{\text{cal}}$ : experimental and calculated scattering vectors and spacings from peak position; I: intensity of reflection, signal intensity code: VS = very strong, S = strong, W = weak,  $hk$  are the Miller indices of the reflections;  $a$ ,  $b$ ,  $\gamma$ , lattice parameters. The lattice parameters of structure I from reference 13 are also given. Basically, only the reflections satisfying  $h+k=2n$  are present.

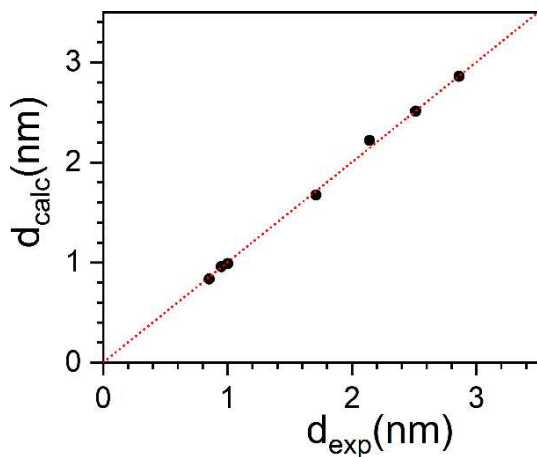

**Figure S2:** distance  $d_{\text{calc}}$  calculated with the above unit cell for TATA/TCE ( $a = 2.98$  nm,  $b = 10.04$  nm,  $\gamma = 90^\circ$ ) versus the experimental values  $d_{\text{exp}}$ . Fit performed with a straight line of fixed slope of 1 and of intercept 0 gives a coefficient of determination  $R^2 = 0.9980$ . Conversely, a linear fit with a fixed intercept (0) gives a slope of 1.004, and a coefficient of determination  $R^2 = 0.9998$ .

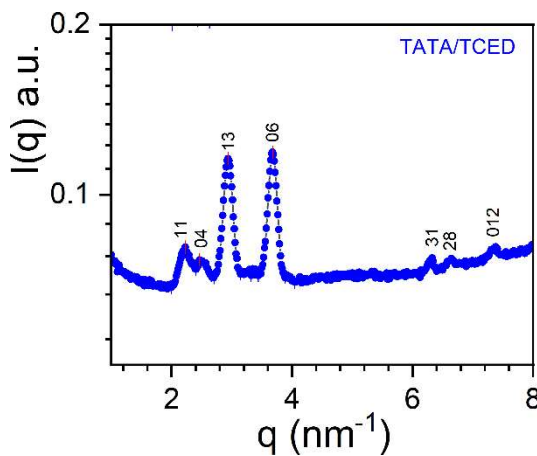

**Figure S3:** Indexation of the  $hk$  planes with the reflections corresponding to  $h+k=2n$ .



| $q_{\text{exp}}$ (nm <sup>-1</sup> ) | $d_{\text{exp}}$ (nm) | I (q) | $hk$      | $d_{\text{cal}}$ (nm) from lattice parameters of Structure I <sup>13</sup> | Lattice parameters of structure I <sup>13</sup>                       |
|--------------------------------------|-----------------------|-------|-----------|----------------------------------------------------------------------------|-----------------------------------------------------------------------|
| 2.449                                | 2.56                  | VS    | <i>11</i> | 2.67                                                                       | Orthorhombic<br>$a = 2.78$ nm<br>$b = 7.85$ nm<br>$\gamma = 90^\circ$ |
| 3.25                                 | 1.933                 | S     | <i>04</i> | 1.96                                                                       |                                                                       |
| 4.79                                 | 1.31                  | M     | <i>22</i> | 1.335                                                                      |                                                                       |

**Table S4:** Diffraction peaks from PVC20/TATA/TCE at T= 50°C. Positions of peaks  $q_{\text{exp}}$ , and the corresponding distance  $d_{\text{exp}}$ , I(q): intensity of reflection, signal intensity code: VS = very strong, S = strong, M= middle, the corresponding Miller indices, and  $d_{\text{cal}}$  calculated with the lattice parameter of structure I<sup>13</sup>. Note that the 13 reflection is absent possibly due to a distortion of the unit cell.
